# Supplementary material for: The Evaluation of Reliability Indices in Water Distribution Networksunder Pipe Failure Condition
Source: Copernicus journal article supplement (doi:10.5194/dwes-2020-37), 2021-02-05
Supplement: Supplementary file [file dwes-2020-37-CC1-supplement.pdf]

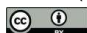

## The Evaluation of Reliability Indices in Water Distribution Networks under Pipe Failure Condition

Alireza Moghaddam<sup>1</sup>, Roya Peirovi-Minaee<sup>2\*</sup>, Hossein Rezaei<sup>3\*</sup>, Alireza Faridhosseini<sup>4,5</sup>, Ali Naghi Ziadeh<sup>4</sup>

<sup>1</sup> PhD in Water Resources Engineering, Department of Civil Engineering, University of Gonabad, Gonabad, Iran

<sup>2</sup> Assistant Professor, Department of Environmental Health Engineering, Faculty of Public Health, Social Determinants of Health Research Center, Gonabad University of Medical Sciences, Gonabad, Iran

<sup>3</sup> Professor, Department of Water Engineering, College of Agriculture, University of Urmia, Urmia, Iran

<sup>4</sup> Associate Professor, Department of Water Engineering, College of Agriculture, Ferdowsi University of Mashhad, Mashhad, Iran

<sup>5</sup> Visiting Professor, College of Engineering, Mathematics & Physical Sciences, University of Exeter, Exeter, UK

\* *Corresponding Author(first):* E-mail addresses: [Peirovi.r@gnu.ac.ir](mailto:Peirovi.r@gnu.ac.ir)

\* *Corresponding Author(second):* E-mail addresses: [h.rezaei@urmia.ac.ir](mailto:h.rezaei@urmia.ac.ir)

15

### Abstract

In this research, reliability indicators of water distribution networks are evaluated under pipe failure conditions. The case studies include two benchmark and one real-life water distribution networks in Iran with more hydraulic constraints. Some important reliability indicators are presented such as resilience index, network resilience, modified resilience index and minimum surplus head index. GANetXL is used to do one-objective and two-objective optimization of the previously mentioned water distribution networks in order to not only minimize the cost, but also maximize the reliability indicators. Moreover, the results of a statistical analysis for each pipe is used to determine the sensitive pipes that are of the most failure probability. GANetXL is an optimization tool in Excel environment and works based on Genetic Algorithm. GANetXL has the capability of being linked to EPANET (Hydraulic simulation software). The results obtained clearly show that network resilience index is of poor performance when compared with the other indexes under pipe failure conditions, especially in real-life networks that include small pipe diameters. It was also showed that if a water distribution network was optimized only in terms of cost, there would be an unacceptable pressure drop at some nodes in case of pipe failure.

**Keywords:** GANetXL, Optimization, Pipe Reliability, Resiliency, Water distribution Network

### 130. Introduction

Water distribution networks (WDNs) are designed to provide users with a minimum acceptable level of supply, in terms of pressure, availability, and water quality at all times under a range of operating conditions, such as (REF). Nowadays, WDNs have become

**Commented [AA1]:** In general, I do like to approach followed but a question remains: what is the impact of these solutions in water quality aspects, particularly water age. In fact, the solution for the Iranian network renders low velocities that makes me wonders how would the network perform (in regards to in-pipe velocity) during low consumption periods.

**Commented [AA2]:** REF denotes that a literature reference should be used

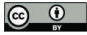

- complex and need huge investments in construction and maintenance (REF). As a result, there is an avid desire to improve their efficiency through minimizing their cost and maximizing their benefit (REF).
- 35 Optimal WDN design is a computationally complex problem because of its non-linear nature and the constraints involved (REF). Therefore, finding the globally optimal solution is difficult if we use optimization methods as the non-linearity is significant. A majority of the previous models have utilized different optimization algorithms for ordinary benchmark networks (REF, REF, REF) meaning that optimal design problems have turned out to be more of mathematical or computational challenges rather than civil engineering ones (REF, REF, REF).
- 40 In the last three decades, several researchers have broadly studied the design optimization problem of WDNs. The problems have been solved using linear, non-linear, and various meta-heuristic methods. Linear and non-linear methods were predominantly used in the period 1960–1990 (Jacoby 1968, Watanatada 1973, Alperovits and Shamir 1977, Quindry, Liebman et al. 1981, Lansey and Mays 1989, Fujiwara and Khang 1990). Linear methods applied to nonlinear problems have not resulted in optimal solutions (REF). The non-linear methods did not necessarily yield a global optimum, and the final solution depended on the
- 45 initial solution used as a starting point for the search procedure (Piratla 2016). In addition, the use of discrete variables, specific-size pipe diameters, limits the quality of the optimal solution obtained (REF). These limitations led to the employment of meta-heuristics that use stochastic optimization methods (REF). Murphy and Simpson were the first researchers who used a simple Genetic Algorithm (GA) to optimally design water distribution systems. This model was applied to determine the least cost combination of pipe diameters and rehabilitation actions
- 50 (Murphy and Simpson 1992). GA has been integrated with hydraulics simulator to optimize the solutions by many researchers (Simpson, Dandy et al. 1994, Simpson and Goldberg 1994, Savic and Walters 1997, Lippai, Heaney et al. 1999, Neelakantan, Suribabu et al. 2008). (Vasan and Simonovic 2010) recently applied a differential evolutionary algorithm (DE), an improved GA. The major difference between GA and DE is that GA relies on crossover, a mechanism of probabilistic exchange of information among solutions to create better solutions, while DE uses mutation as the primary search mechanism (REF). DE uses a
- 55 uniform crossover that can take child vector parameters from one parent more often than from the other one (REF). It is said that GA most of the times succeed in finding the global optimum or at least arriving at somewhere very close to it (REF). More importantly, GA is capable of handling discrete optimization (as pipe diameters are discrete) (Savic and Walters 1997). Many other optimization algorithms have been used in the optimal design of water distribution systems (Tayfur 2017). (Loganathan, Greene et al. 1995) and (Cunha and Sousa 1999) applied simulated annealing for optimal design of water
- 60 distribution systems. (Geem, Kim et al. 2002) developed a harmony search optimization approach to solve network design problems while (Eusuff and Lansey 2003) developed the shuffled frog leaping algorithm. (Maier, Simpson et al. 2003) applied the ant colony optimization approach and improved GA both in terms of computational efficiency and its ability to find nearly optimal solutions. (Baños, Gil et al. 2007) analyzed the performance of memetic algorithms for optimal design of looped water distribution systems and demonstrated that it works well for problems of large scale. (Mohan and Babu 2009) proposed to use a
- 65 heuristic based approach called heuristics-based algorithm (HBA) to identify the least cost combination of pipe diameters. They demonstrated that the HBA is capable of identifying the least cost combination of pipe diameters with fewer numbers of evaluations. (Moghaddam, Alizadeh et al. 2018) applied a Simple Modified Particle Swarm Optimization (SMPSO) to minimize the cost of water distribution networks. SMPSO then used a novel factor to decrease the inertia weight of the algorithm in proportion with simulation time to facilitate both global and local search.

**Commented [AA3]:** What do you mean difficult? There is not a single solution but a variety of good solution with an optimum? The computation takes too long and there's the need for computation power? Be more specific

**Commented [AA4]:** I don't understand this sentence

**Commented [AA5]:** I sense that this has a negative connotation and the question is, why? I.e. is the fact that the exercise have become too academic a "bad" thing? Why and to whom?

**Commented [AA6]:** Do you mean since 1990? Because right after you give REFs for the period of 1960-90 so there is a mismatch between these ideas

**Commented [AA7]:** Can you be more specific?

**Commented [AA8]:** Is this better? If so why?

**Commented [AA9]:** What is the point of enumerating all these and then selecting GA/DE? Is GA/DE better than these, why? From a narrative perspective these should be enumerated before your selection, not after.

Also: are all these algorithms considered GA? It's not clear





70 Objective function is important in optimizing the design of distribution systems. The main negative aspect of the single-objective constrained formulation is that it does not effectively set up a trade-off between cost and reliability/robustness of a design (Todini 2000). Reliability can be considered as the ability of providing an adequate supply under both usual and unusual conditions (Farmani, Savic et al. 2005), including demand uncertainty, pipe failure, etc. One of the most used reliability criteria is the concept of resilience index suggested by (Todini 2000), which is a measure of the ability of the network to handle failures and is related indirectly to system reliability. Several suggestions were made to modify the resilience index introduced by Todini (Prasad and Park 2004, Farmani, Savic et al. 2005, Jayaram and Srinivasan 2008, Reza, Martinez et al. 2008, Raad, Sinske et al. 2010, Baños, Reza et al. 2011, Greco, Di Nardo et al. 2012, Pandit and Crittenden 2012). Literature review shows that stochastic models, particularly the GA types, give better results than linear and non-linear optimization models (Pandit and Crittenden 2012). Subsequently, a genetic algorithm technique is used in this research as a part of GANetXL (Savić, Bicić et al. 2011), an add-in to Microsoft Excel. GANetXL is used to optimize two benchmark networks from literature (Two-loop and Hanoi water networks) in two different conditions including single-objective (cost) and two-objective (cost and reliability criteria) optimizations. Afterwards, the solutions obtained, as well as the performance of the proposed Resilience Index, Network Resilience, Modified Resilience Index and Minimum Surplus Head Index are discussed. Finally, as the results obtained for the benchmark networks are satisfactory, GANetXL is used to design a real-life water network.

85 In Iran in which there are more hydraulic constraints compared with the benchmark networks. There are a few applications of GANetXL in water systems, which include the development of a model for optimal management of groundwater contamination (Farmani, Savic et al. 2005, Farmani, Henriksen et al. 2009) and multi-objective optimization of water distribution systems (Piratla and Ariaratnam 2012, Mala-Jetmarova, Barton et al. 2015, Piratla 2016).

**Commented [AA10]:** You have to better introduce this concept

**Commented [AA11]:** What is the added value of this information? i.e. what was the result of these suggestions?

**Commented [AA12]:** I fail to understand the points made in this paragraph: what's the link between objective functions (and why are these important), single-objective constrained formulation and reliability? These concepts seem to be somehow linked but it's unclear how exactly

**Commented [AA13]:** You had already underlined the superiority of GA – why are you doing it again here?

**Commented [AA14]:** Why do you use this particular GA?

**Commented [AA15]:** You have to move this to when you introduce GANetXL for the first time.

## 290. Material and Methods

### 2.1 Optimization Model for WDN Design

In this paper, WDNs are optimized with pipe diameters as decision variables. Cost is considered as the objective function that must be minimized [Eq. (1)] and the reliability criteria are modeled in the form of a two-objective function [Eq. (2)].

(1)

95.

(2)

Where  $c_1$  is network cost,  $c_2$  is network reliability,  $c_3$  is cost for unit length of pipe with diameter, length and  $i$  is pipe numbers in the network.

### 2.2 Constraints

100 The constraints to the optimization problem are as follows:

1) Explicit system constraints such as conservation of mass of flow, conservation of energy and conservation of mass of constituent, which all are controlled by water network simulator software, EPANET (Rossman 2000, Mala-Jetmarova, Barton et al. 2015).

2) Implicit bound constraints, which include choosing pipe diameters from a commercially available set of discrete pipe sizes

105 [Eq. (3)], minimum and maximum pressure at load nodes [Eq. (4)], minimum and maximum velocity in pipes [Eq. (5)].

(3)



$$\leq \leq , = 1, 2, \dots, \quad (4)$$

$$= \text{diameter of pipe}; \quad = k\text{th commercially available pipe size}; \quad = \text{number of available pipe sizes}; \quad = \text{hydraulic-} \quad (5)$$

110 head available at node ; = minimum hydraulic-head required at node ; = maximum hydraulic-head at node ; = number of demand  
 nodes; = minimum velocity required at pipe and = maximum velocity at pipe ; = number of pipes.

## 2.3 Reliability Indicators

115 A range of reliability criteria has been introduced to different degrees of complexity. Usually, these criteria give some suggestion  
 of the ability of a WDN to handle changing conditions and are straightforward to analyze so are practical for optimization studies  
 that compare the performance of network design. This section presents the definition of the key criteria and their derivatives as  
 well as the advantages and disadvantages of them.

### 1202.3.1 Resilience Index ( )

Todini's resilience index is a popular surrogate measure within the WDN research field (Todini 2000, Reza, Martinez et al. 2008,  
 Atkinson, Farmani et al. 2014). It considers surplus hydraulic power as a proportion of available hydraulic power. The resilience index, ,  
 is measured in the continuous range of [0-1] (for feasible solutions of  $\leq$ ) and is formulated as below (Todini 2000):

$$125 = \frac{\sum_{i \in S} (H_i - H_{req,i})}{\sum_{i \in S} H_i} \quad (6)$$

Where is the number of supply and demand nodes; is the set of supply nodes (reservoir/emptying tanks); denotes the number of  
 pumps; is the available head at supply node ; represents the required head at supply node ; is the demand at node ; is the supply  
 at input node ; is representative of head associated with the input node ; is the power of pump ; and finally is the specific weight  
 of water. Maximization of the resilience index improves the ability of a pipeline

130 network in encountering failure conditions.

### 2.3.2 Network Resilience ( )

Prasad and Park (2004) introduced another reliability measure called network resilience ( ), which incorporates the effects of  
 both surplus power and reliable loops. Reliable loops can be ensured if the pipes connected to the same node do not vary greatly  
 135 in diameter. If  $d_1, d_2, \dots, d_{np}$  (where  $d_1 \geq d_2 \geq \dots \geq d_{np}$ ) are the diameters of the  $np$  pipes connected to node  $j$ , then uniformity of that node is given by Eq. 7,

$$= \frac{\sum_{i=1}^{np} d_i}{np} \quad (7)$$

where is the number of pipes connected to node . The value of = 1 if the diameter of the pipes connected to the same node are the  
 same; and <1 if the pipes connected to a node have different diameters. For nodes connected to only one pipe,

140 the value of is taken to be one.

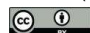

$$\Sigma = 1 - \left( \frac{\sum_{i=1}^n (P_i - P_{min})}{\sum_{i=1}^n (P_i - P_{min})} \right) \quad (8)$$

Theoretically, the value of network resilience may vary between 0 and 1. However, for real-world systems it never attains a value of 1, since imposing the same diameter to all pipes in a network need not always provide a Pareto-optimal solution in Cost- space, as is a measure of the combined effect of surplus power and nodal uniformity.

145

### 2.3.3 Modified Resilience Index ( )

Jayaram and Srinivasan (Jayaram and Srinivasan 2008) proposed a modified resilience index ( ), which theoretically overcomes the drawback of Todini's resilience index when evaluating networks with multiple sources. In contrast to Todini's resilience index, the value of the modified resilience index is directly proportional to the total surplus power at the demand

150 nodes. Eq. (9) describes, which only considers the solutions with pressures equal to or higher than that required in all nodes.

While Todini's and Prasad's take values up to a maximum of 1, Jayaram's can be greater than 1 (Baños, Reza et al.

2011).

$$= \frac{\sum_{i=1}^n (P_i - P_{min})}{\sum_{i=1}^n (P_i - P_{min})} \quad (9)$$

### 2.3.4 Minimum Surplus Head Index ( )

155 In a WDN, minimum surplus head, , is defined as the lowest nodal pressure difference between the minimum required and observed pressure, formulated as

$$= \left( \frac{\sum_{i=1}^n (P_i - P_{min})}{\sum_{i=1}^n (P_i - P_{min})} \right) \quad (10)$$

Maximization of the available surplus head at the most depressed node to some extent improves the reliability of a network (Prasad and Park 2004).

160

## 2.4 GANetXL

GANetXL is used as the optimization tool in this research. GANetXL has been developed by the Center for Water System of University of Exeter as an add-on in Microsoft Excel (Miri and Afshar 2014). It is a common optimization tool with spreadsheet-based interface for solving both single-objective and multi-objective optimization problems (Savić, Bicik et al. 2011). The

165 primary advantage of GANetXL is its capability of easy integration with EPANET via Visual Basic. GANetXL incorporates GA for single-objective and NSGA-II for multi-objective optimizations (Deb, Pratap et al. 2002). In addition, it has the capability to apply penalty functions. GANetXL is well suited for solving multi-objective optimization problems (Mala-Jetmarova, Barton et al. 2014).

In this paper GANetXL is employed in two steps: in the first step for single-objective optimization based on GA and the second

170 step for two-objective optimization based on NSGA-II. GA and NSGA-II parameters such as population size, the number of generations, selection method, crossover and mutation operators, crossover and mutation probability and the type of algorithm were tested and reasonably well-performing parameters selected for final optimization runs. These parameters are presented in Table 1 for three example networks, which are described in the following sections. The crossover and mutation types are described in details in CWS (2011).

175 Table 1. Optimum GA and NSGA-II values for the three case studies in this paper

Commented [AA16]: You have to introduce these drawbacks in the intro

Commented [AA17]: This is introduction, it's not M&M

Commented [AA18]: Why did you do it like that, is this the common approach?

Commented [AA19]: Why did you use the parameters?



| Parameter                       | Parameter values or method selected |                             |
|---------------------------------|-------------------------------------|-----------------------------|
|                                 | Two-loop Network                    | Hanoi and Real-life Network |
| Algorithm                       | Generalation                        | Generational Elitist        |
| (Only in single-objective mode) |                                     |                             |
| Population size                 | 70                                  | 100                         |
| Number of generations           | 1000                                | 1000                        |
| Selection Method                | Roulette                            | Tourenmate                  |
| Crossover operator              | Simple one point                    | Simple one point            |
| Mutation operator               | Simple by gene                      | Simple                      |
| Crossover probability           | 0.8                                 | 0.95                        |
| Mutation rate                   | 0.01                                | 0.7                         |
| Adaptive mutation               | Yes                                 | Yes                         |

### 3. Results and Discussion

Three example applications are studied: the Two-loop (Alperovits and Shamir 1977), Hanoi (Fujiwara and Khang 1990), which are the benchmark networks, as well as a real-life case study in Iran.

180

#### 3.1 Example 1: The Two-loop network

The Two-loop network, shown in figure. 1, was originally presented by Alperovits and Shamir (Alperovits and Shamir 1977).

The network consists of 7 nodes and 8 pipes with two loops, and is fed by gravity from a reservoir with a 210 m fixed head.

Nodal demands and elevations are given in Table 2. The pipes are all 1000 m long with the assumed Hazen-Williams coefficient

185 of 130. The minimum pressure head requirement of the other nodes is 30 m above the nodal elevations. There are 14 commercial diameters to be selected whose costs and diameters are given in Table 3.

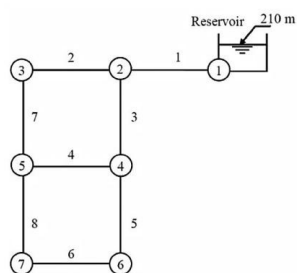

Fig. 1 The layout of Two-loop network.

Table 2. Node demands and elevations for Two-loop network

| Node | Elevation (m) | Demand (m <sup>3</sup> /h) |
|------|---------------|----------------------------|
|------|---------------|----------------------------|

190



|                    |     |       |
|--------------------|-----|-------|
| 2                  | 150 | 100   |
| 3                  | 160 | 100   |
| 4                  | 155 | 120   |
| 5                  | 150 | 270   |
| 6                  | 165 | 330   |
| 7                  | 160 | 200   |
| <b>Reservoir 1</b> | 210 | -1120 |

Table 3. Pipe sizes and costs for Two-loop network

| Pipe | Diameter (mm) | Cost (\$/m) |
|------|---------------|-------------|
| 1    | 25.4          | 2           |
| 2    | 50.8          | 5           |
| 3    | 76.2          | 8           |
| 4    | 101.6         | 11          |
| 5    | 152.4         | 16          |
| 6    | 203.2         | 23          |
| 7    | 254.0         | 32          |
| 8    | 304.8         | 50          |
| 9    | 355.6         | 60          |
| 10   | 406.4         | 90          |
| 11   | 457.2         | 130         |
| 12   | 508.0         | 170         |
| 13   | 558.8         | 300         |
| 14   | 609.6         | 550         |

In the first step, as a result of single-objective optimization of the Two-loop network using GA technique in GANetXL, the minimum cost obtained 419000\$ with 35000 number of function evaluations (NFEs) which is the same to minimum costs obtained by GA (Savic and Walters 1997), Simulated Annealing (SA) (Cunha and Sousa 1999), Shuffled frog leaping Algorithm (SFLA) (Eusuff and Lansey 2003), Harmony Search (HS) (Geem 2009) and Scatter search (SS) (Lin, Liu et al. 2007) with 250000, 25000, 11323, 5000 and 3215 NFEs, respectively.

As a result, minimum cost is 419000\$ for one-objective optimization of this network using GANetXL after 1000 generations that is equal with minimum costs obtained by GA, Simulated Annealing (SA), Shuffled frog leaping Algorithm (SFLA) Harmony Search (HS) and Scatter search (SS) (Savic and Walters 1997, Cunha and Sousa 1999, Geem, Kim et al. 2002, Eusuff and Lansey 2003, Geem 2009).

In the second step, figure 2 (a-d) shows the obtained Pareto front for two-objective optimization of two-loop network using NSGA-II in GANetXL considering  $I_r$ ,  $I_n$ ,  $MRI$  and  $I_m$  as the second objective function, respectively. All of the solutions

**Commented [AA20]:** Are these results for the same network from other authors?

**Commented [AA21]:** The same as before, are these the costs obtained from other authors?



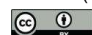

205 in this Pareto front are feasible (and all the network constraints are satisfied). As it is observed the cost changes in the range of  $[0.424 \times 10^6$   
-  $4.400 \times 10^6$ ] \$ and  $I_r$ ,  $I_n$ ,  $MRI$  and  $I_m$  criteria changes in the ranges [0.338-0.903], [0.287-0.903], [0.040-0.107]

and [0.122-12.856], respectively. In the cost range of  $[0.424 \times 10^6$ - $1 \times 10^6$ ] \$, Cost-  $I_n$  Pareto front shows more and varied solutions,  
in comparison to other graphs. However, with increase in cost, non-dominated solutions decreases and the current continuity in  
Pareto front disappears while Cost-  $I_r$  and Cost-  $MRI$  Pareto fronts have better performance. In Cost-  $I_m$  graph

210 the variety of obtained solutions in the lower and upper bound of Pareto front is lower than other graphs.

**Commented [AA22]:** Could you quantify this or explain how you reach this conclusion?

**Commented [AA23]:** Please link this to Figs a-d

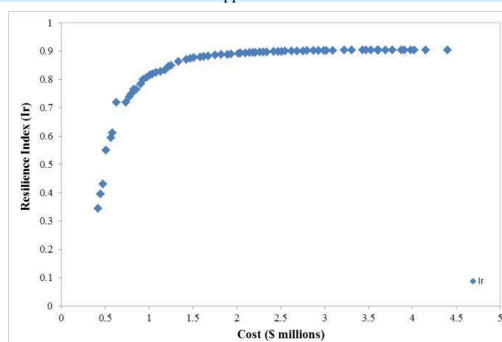

a)

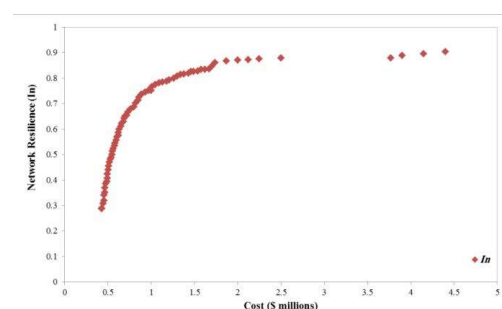

b)

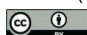

215

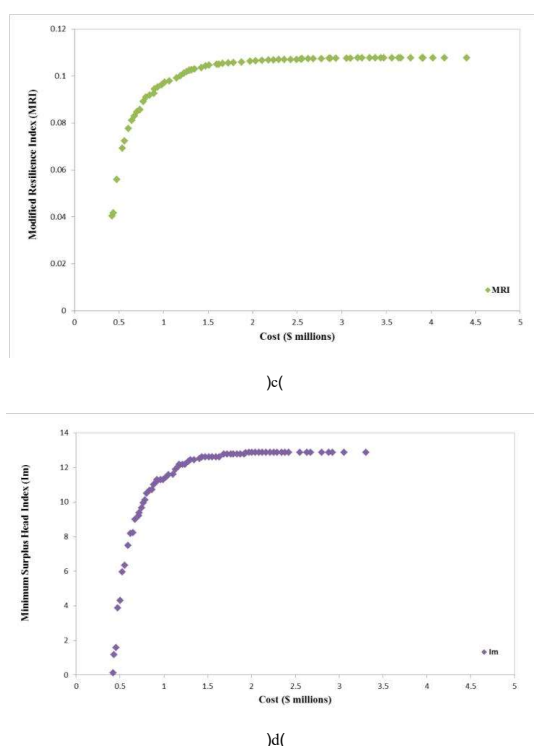

Fig. 2 Pareto front of two-objective function optimization of the Two-loop network, (a) Cost-  $I_r$ , (b) Cost-  $I_n$ , (c) Cost-  $MRI$ , (d) Cost-  $I_m$

220

Figure 3 shows the surplus pressure of the minimum pressure head requirement in the nodes of Two-loop network for solutions with maximum reliability criteria and minimum cost. As it is observed, the surplus pressure of the nodes in the solutions with minimum cost is lower than the solutions of maximum reliability criteria (  $I_r$ ,  $I_n$ ,  $MRI$  and  $I_m$  ). Also, the design based on single-objective function (minimum cost), surplus pressure is closer to the minimum allowed pressure in nodes 3, 6, and 7, showing that these nodes are the critical nodes of the network. As a result, if the two-loop network was designed only based on minimum cost, in critical periods such as pipe failures, there would be problems issues at these nodes.

225

Reliability evaluation should be analyzed under all feasible extreme conditions. Failure of multiple pipes as well as the failure of the reservoir connection line during a firefighting event and/or power or pumping station failures should be evaluated



simultaneously. Although an infinite number of failure scenarios are likely, the probability of simultaneous failures in multiple pipes is too low (Tabesh, Tanyimboh et al. 2001). Pipe failures independency can be assumed (Su, Mays et al. 1987) and any likely dependency will be negative. For example, if a pipe failure occurs in the network, the pressure will decrease, and consequently the probability of another pipe failure will decrease as well. However, in case the system is a large-scale WDN, the influence of pressure might not be significant. Other pipe failure reasons, such as damages or traffic loadings, may lead to pipe failures that are completely independent events (Shafiqul Islam, Sadiq et al. 2013).

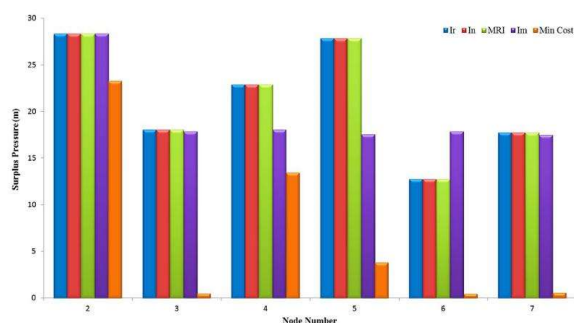

Fig. 3 Surplus pressure of nodes in two-loop network for solutions of maximum reliability criteria and minimum cost

In this paper, to evaluate reliability of the candidate solutions of maximum  $I_r$ ,  $I_n$ ,  $MRI$  and  $I_m$  criteria, the nodal pressures have been investigated under pipe failure conditions. Table 4 presents the statistical parameters of each pipe in two-loop network under different runs of single-objective optimizations when the objective function is to minimize cost. This table helps the

designers to recognize critical and sensitive pipes that have the most probability of failure in the network. For example, maximum and minimum diameters that are allocated to pipe 1 in different runs of GANetXL are 24 and 18 inch, respectively.

Table 4. Statistical parameters for diameters obtained for each pipe of two-loop network

| Pipe numb | Maximum (m) | Minimum (m) | Average (m) | ST. DEV      | Variance | C.V.        |
|-----------|-------------|-------------|-------------|--------------|----------|-------------|
| 1         | 609.6       | 457.2       | 459.35      | 17.96        | 322.52   | 0.04        |
| 2         | 304.8       | 152.4       | 248.28      | <b>26.35</b> | 694.18   | <b>0.11</b> |
| 3         | 457.2       | 406.4       | 452.91      | <b>14.13</b> | 199.65   | <b>0.03</b> |
| 4         | 254         | 101.6       | 208.21      | 41.03        | 1683.23  | 0.20        |
| 5         | 609.6       | 406.4       | 469.36      | <b>37.62</b> | 1414.97  | <b>0.08</b> |
| 6         | 508         | 101.6       | 251.85      | 57.47        | 3302.97  | 0.23        |
| 7         | 558.8       | 76.2        | 217.87      | 63.47        | 4028.38  | 0.29        |
| 8         | 304.8       | 25.4        | 68.69       | 58.51        | 3423.79  | 0.85        |



According to Table 4, pipe numbers 2, 3 and 5 that have minimum standard deviations and variation coefficients are chosen for failure analysis. Pipe 1 belongs to a water transmission line from the reservoir to the network that is important during network operation. If a failure is considered in this pipe, then the network will be unreliable. That is why this pipe is not taken into account for failure analysis. Figure 4 shows the performance of solutions with maximum reliability criteria under the failure of pipes 2, 3 and 5.

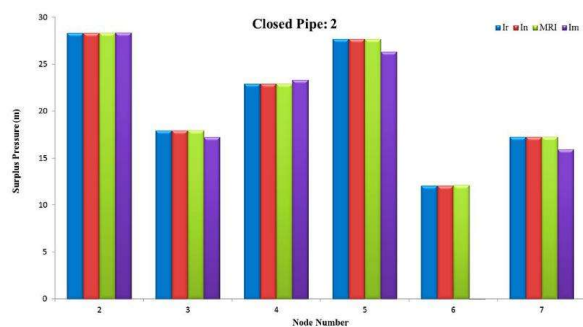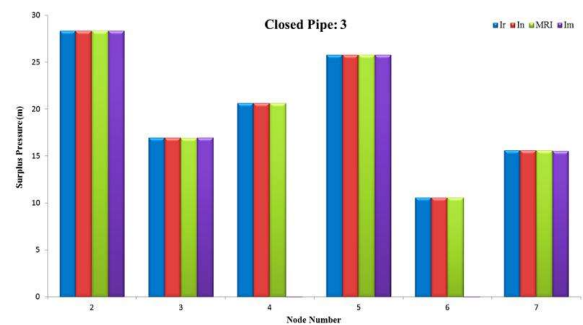

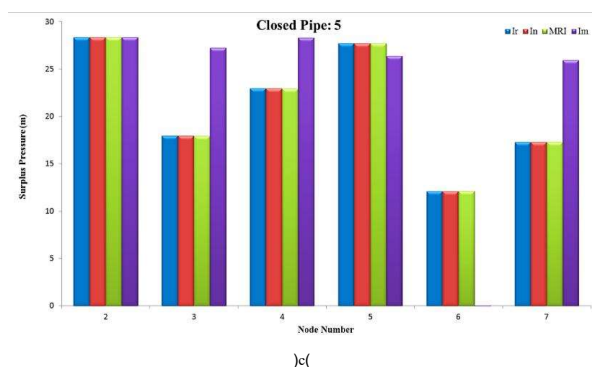

Fig. 4 Surplus pressure of nodes in two-loop network for solution with maximum reliability criteria under failure of pipes No. (a) 2, (b) 3 and (c) 5

Figure 4 shows that, nodeNo. 6 encounters with a serious pressure loss with failure in pipe No. 2, 3 and 5 in represented solutions by  $I_m$  criterion. In represented solutions based on  $I_r$ ,  $I_n$  and  $MRI$  for all the pipes of the network the diameter was 609.6 mm while in the obtained solution with maximum  $I_m$ , the diameter of pipes No. 4 and 6 was 25.4 mm and other pipes were 609.6 mm. Consequently,  $I_m$  criterion is of lower performance than any other criterion under pipe failure condition.

### 3.2 Example 2: The Hanoi network

The Hanoi network in Vietnam (Figure. 5), first presented by Fujiwara and Khang, is a new design as all new pipes are to be selected. The network consists of 32 nodes and 34 pipes organized in three loops. The system is gravity fed by a single reservoir.

The network details are given in Table 5. The minimum required pressure head for all nodes is 30 m and the elevation for all nodes is zero. There are six available pipe diameters to be selected for each new pipe and the pipe cost per meter for the six available pipe diameters are listed in Table 6.

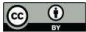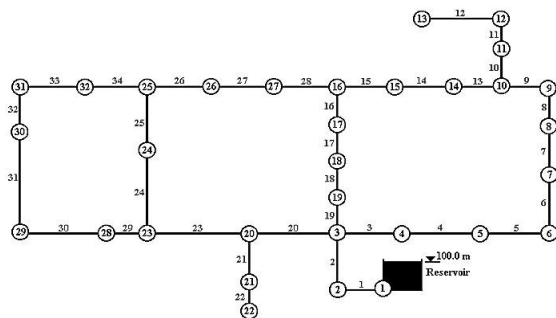

Fig. 5 Layout of Hanoi network

Table 5. Network data for the Hanoi network

| Node data |            | Pipe data |            |
|-----------|------------|-----------|------------|
| Node      | Demand (m) | Pipe      | Length (m) |
| 1         | -19940     | 1         | 100        |
| 2         | 890        | 2         | 1350       |
| 3         | 850        | 3         | 900        |
| 4         | 130        | 4         | 1150       |
| 5         | 725        | 5         | 1450       |
| 6         | 1005       | 6         | 450        |
| 7         | 1350       | 7         | 850        |
| 8         | 550        | 8         | 850        |
| 9         | 525        | 9         | 800        |
| 10        | 525        | 10        | 950        |
| 11        | 500        | 11        | 1200       |
| 12        | 560        | 12        | 3500       |
| 13        | 940        | 13        | 800        |
| 14        | 615        | 14        | 500        |
| 15        | 280        | 15        | 550        |
| 16        | 310        | 16        | 2730       |
| 17        | 865        | 17        | 1750       |
| 18        | 1345       | 18        | 800        |
| 19        | 60         | 19        | 400        |
| 20        | 1275       | 20        | 2200       |
| 21        | 930        | 21        | 1500       |



|    |      |    |      |
|----|------|----|------|
| 22 | 485  | 22 | 500  |
| 23 | 1045 | 23 | 2650 |
| 24 | 820  | 24 | 1230 |
| 25 | 170  | 25 | 1300 |
| 26 | 900  | 26 | 850  |
| 27 | 370  | 27 | 300  |
| 28 | 290  | 28 | 750  |
| 29 | 360  | 29 | 1500 |
| 30 | 360  | 30 | 2000 |
| 31 | 105  | 31 | 1600 |
| 32 | 805  | 32 | 150  |
|    |      | 33 | 860  |
|    |      | 34 | 950  |

Table 6. Pipe sizes and costs for Hanoi network

| Pipe | Diameter (mm) | Cost (\$/m) |
|------|---------------|-------------|
| 1    | 304.8         | 45.726      |
| 2    | 406.4         | 70.400      |
| 3    | 508.0         | 98.378      |
| 4    | 609.6         | 129.333     |
| 5    | 762.0         | 180.748     |
| 6    | 1016.0        | 278.280     |

275 In the first step, as a result of single-objective optimization, GA method in GANetXL obtained a minimum cost of  $6.097 \times 10^6$  \$ with 100000 NFEs for this network while in the previous researches the methods of GA(Savic and Walters 1997), Ant Colony Optimization (ACO)(Zecchin, Simpson et al. 2006), and Shuffled Complex Evolution (SCE) Liong and Atiquzzaman (Atiquzzaman and Liong 2004) reported costs of 6.195, 6.134 and 6.22 million\$ with 1000000, 25402 and 85571 NFEs, respectively.

280 In the second step, figure 6. (a-d) shows non-dominated solutions of Hanoi network which calculated by NSGA-II considering minimum cost versus maximum reliability criteria and all of the solutions in the Pareto front is feasible. As it is observed in figure 7 minimum values of  $I_r$ ,  $I_n$ ,  $MRI$  and  $I_m$  are 0.228, 0.256, 0.555 and 0.090 and maximum values are 0.353, 0.353, 0.825 and 19.916, respectively. Cost values change in a range of  $[6.251 \times 10^6 - 10.791 \times 10^6]$  \$ for Cost-  $I_r$  and in  $[6.584 \times 10^6 - 10.969 \times 10^6]$  \$ Cost-  $I_n$  space that the increase in Cost-  $I_n$  to Cost-  $I_r$  is due  $C_f$  factor in formula [Eq. (8)] which cause

285 uniformity diameters in the design phase. In this example monotony and variety of represented solutions are observed in all Pareto fronts, the reason can be found in the increase of the network size and possible solutions for network design.

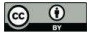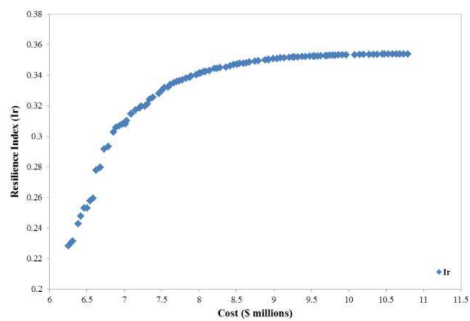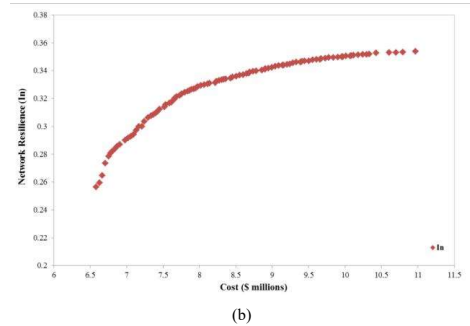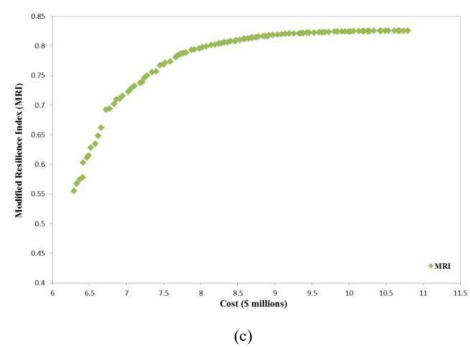



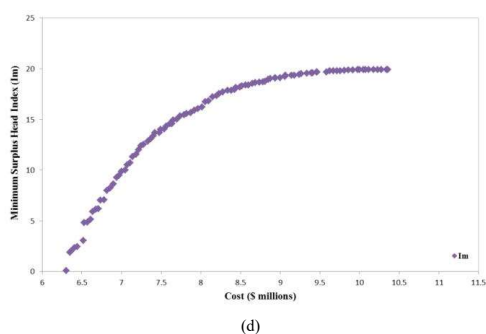

295 Fig. 6 Pareto front of two-objective function optimization of the Hanoi network, (a) Cost-  $I_r$ , (b) Cost-  $I_n$ , (c) Cost-  $MRI$ , (d) Cost-  $I_m$

Figure 7 shows the surplus pressure in comparison with minimum allowed pressure in the nodes of the Hanoi network for solutions of maximum reliability criteria and minimum cost. In the cost-based optimization, surplus pressure in nodes No. 13, 30 and 31 is less than 1 m which shows that these nodes are the most critical ones of this network.  $I_r$ ,  $I_n$  and  $MRI$  criteria have similar performance for all the nodes, but  $I_m$  criterion determinates more surplus pressure for most of the nodes than other criteria in this network unlike the two-loop network.

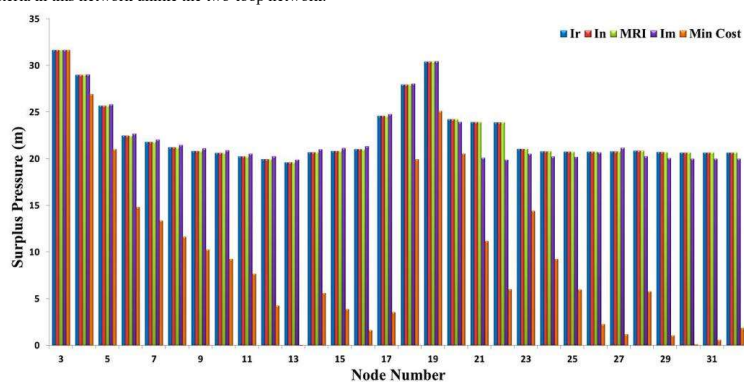

Fig. 7 Nodal surplus pressure of Hanoi network for solutions of maximum reliability criteria and minimum cost

Table 7 shows the statistical parameters for each pipe of Hanoi network due to different runs of single-objective optimizations by GANetXL. According to this table, Pipes No. 4, 5, 6 and 20 that have standard deviation and variation coefficient equal to zero have been chosen for reliability evaluation when there is a failure in the network.



Table 7. Statistical parameters for diameters obtained for each pipe of Hanoi network

| Pipe number | Maximum (m) | Minimum (m) | Average (m) | ST. DEV | Variance | C.V. |
|-------------|-------------|-------------|-------------|---------|----------|------|
| 1           | 1016        | 762         | 1005.84     | 49.77   | 2477.41  | 0.05 |
| 2           | 1016        | 762         | 1010.92     | 35.56   | 1264.51  | 0.04 |
| 3           | 1016        | 508         | 1005.84     | 61.38   | 3767.73  | 0.06 |
| 4           | 1016        | 1016        | 1016        | 0       | 0        | 0    |
| 5           | 1016        | 1016        | 1016        | 0       | 0        | 0    |
| 6           | 1016        | 1016        | 1016        | 0       | 0        | 0    |
| 7           | 1016        | 762         | 1013.46     | 25.27   | 638.71   | 0.02 |
| 8           | 1016        | 762         | 1005.84     | 49.77   | 2477.41  | 0.05 |
| 9           | 1016        | 508         | 1008.38     | 56.28   | 3167.74  | 0.06 |
| 10          | 1016        | 508         | 889         | 136.78  | 18709.64 | 0.15 |
| 11          | 762         | 304.8       | 608.584     | 47.64   | 2269.93  | 0.08 |
| 12          | 762         | 508         | 611.124     | 31.69   | 1004.13  | 0.05 |
| 13          | 1016        | 406.4       | 495.808     | 67.82   | 4599.73  | 0.14 |
| 14          | 1016        | 304.8       | 477.52      | 107.52  | 11561.27 | 0.23 |
| 15          | 762         | 304.8       | 387.604     | 146.47  | 21453.12 | 0.38 |
| 16          | 1016        | 304.8       | 341.376     | 110.85  | 12287.98 | 0.32 |
| 17          | 508         | 406.4       | 447.04      | 49.77   | 2477.41  | 0.11 |
| 18          | 1016        | 508         | 662.432     | 137.61  | 18937.77 | 0.21 |
| 19          | 762         | 406.4       | 511.048     | 43.59   | 1900.38  | 0.09 |
| 20          | 1016        | 1016        | 1016        | 0       | 0        | 0    |
| 21          | 1016        | 406.4       | 510.032     | 53.72   | 2886.19  | 0.11 |
| 22          | 1016        | 304.8       | 399.288     | 210.32  | 44233.20 | 0.53 |
| 23          | 1016        | 762         | 1013.46     | 25.27   | 638.71   | 0.02 |
| 24          | 1016        | 609.6       | 824.484     | 120.18  | 14444.10 | 0.15 |
| 25          | 1016        | 609.6       | 850.392     | 126.00  | 15877.13 | 0.15 |
| 26          | 1016        | 406.4       | 541.528     | 117.66  | 13843.59 | 0.22 |
| 27          | 1016        | 304.8       | 414.528     | 220.58  | 48656.42 | 0.53 |
| 28          | 1016        | 304.8       | 369.824     | 135.95  | 18481.51 | 0.37 |
| 29          | 1016        | 304.8       | 504.952     | 102.06  | 10416.50 | 0.20 |
| 30          | 609.6       | 304.8       | 446.024     | 64.09   | 4107.35  | 0.14 |
| 31          | 609.6       | 304.8       | 346.456     | 78.82   | 6213.15  | 0.23 |
| 32          | 1016        | 304.8       | 799.592     | 263.14  | 69244.76 | 0.33 |
| 33          | 1016        | 304.8       | 491.236     | 163.36  | 26686.66 | 0.33 |
| 34          | 762         | 406.4       | 514.604     | 40.42   | 1633.80  | 0.08 |



The results of figure 8.(a) and (b) shows that by failure in pipes No. 4 and 5 the surplus pressure in most of the nodes for solutions of maximum  $I_m$  criterion is more than solutions with maximum  $I_r$ ,  $I_n$  and  $MRI$ . In effect of pipes No. 4 and 5 failures, nodes reactions to pressure changes are similar because these two pipes are along. However, due to failure in pipe No. 6, none of the nodes of the network meet lack of pressure and the figure 8.(c) shows that the solutions with maximum  $I_n$  and  $MRI$  criteria has more capability to supply pressure in most of the networks. In figure 8.(d) there is no significant difference in represented solutions with reliability criteria values. The nodes with no values in the graph are those that have negative pressures.

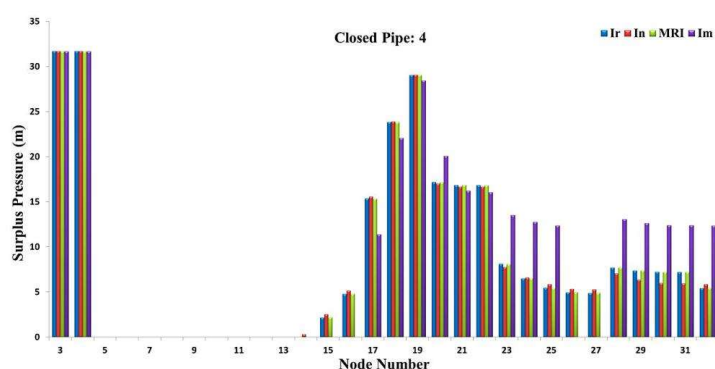

a)

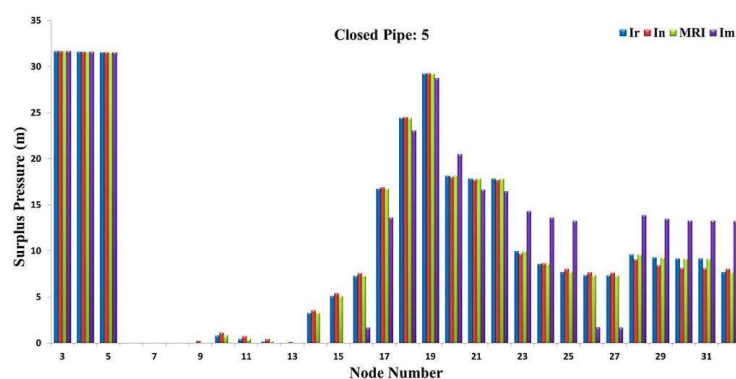

b)

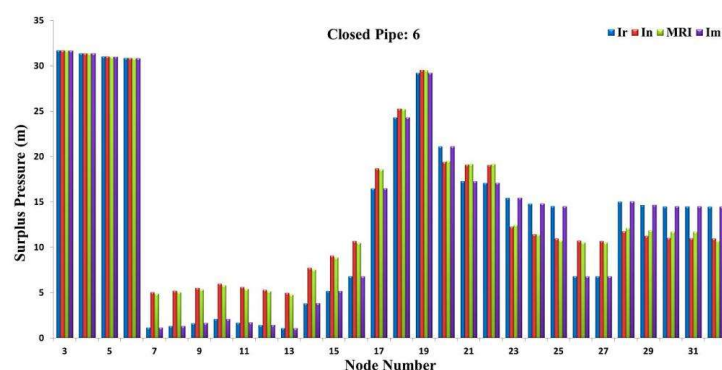

)c(

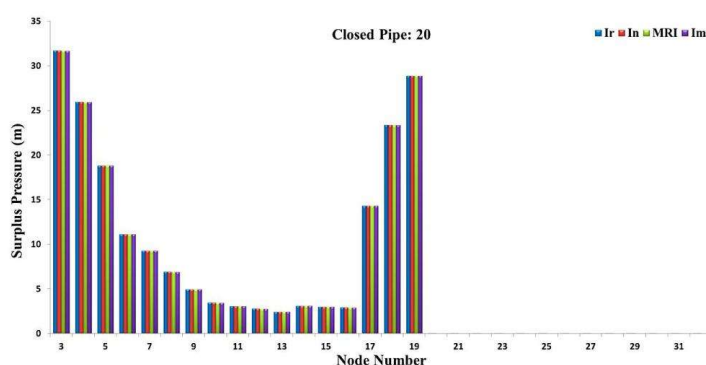

)d(

Figure 8. Surplus pressure of Hanoi network nodes for solutions of maximum reliability criteria when pipes No. (a) 4, (b) 5, (c) 6 and (d) 20 are lost due to failure

### 3.253 Example 3: The Real-life network

Real-life WDN is located in Iran and it has 37 pipes, 24 nodes and a reservoir with a 962 m fixed head. The design purpose of this network is municipal water supply of city and improving of the existing condition of the WDN (figure. 9). For this purpose, a series of pipes which have diameters more than 100 mm are used for future conditions (Rasekh, Afshar et al. 2010). For designing this network, polyethylene pipes (PE-80) with Hazen-Williams coefficient of 130 are used. Table 8 presents the nodes 330 and pipes characteristics. Table 9 gives the diameter of these polyethylene pipes as well as cost per unit length. In the design of



the network, nodes pressure and velocity constraints are between 14-60 m and 0.2-2 m/s, respectively (Department of Technical Affairs 2013). There are more constraints in this example than the other ones.

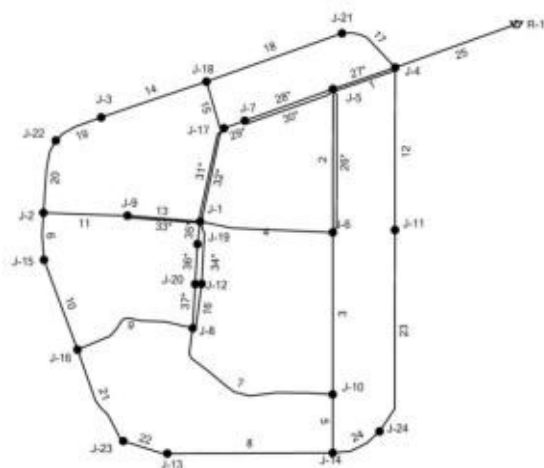

Fig. 9 Layout of Real- life network

335

Table 8. Pipes data for real- life WDN

| Pipe data | Pipe          | 1        | 2     | 3     | 4     | 5     | 6     | 7     | 8     | 9     | 10    | 11    | 12    |       |
|-----------|---------------|----------|-------|-------|-------|-------|-------|-------|-------|-------|-------|-------|-------|-------|
|           | Length (m)    | 73.287   | 54.62 | 705   | 78.58 | 254.5 | 205.4 | 805.5 | 723.2 | 556.5 | 417.2 | 367.8 | 707.1 |       |
|           | Pipe          | 13       | 14    | 15    | 16    | 17    | 18    | 19    | 20    | 21    | 22    | 23    | 24    |       |
|           | Length (m)    | 320.95   | 485.5 | 226.4 | 201.4 | 292   | 628.8 | 225.2 | 323.0 | 451.7 | 200.8 | 897.3 | 232.5 |       |
| Node data | Pipe          | 25       | 26*   | 27*   | 28*   | 29*   | 30*   | 31*   | 32*   | 33*   | 34*   | 35*   | 36*   | 37*   |
|           | Length (m)    | 9999.87  | 634.9 | 299.6 | 409.0 | 96.62 | 423.9 | 427.0 | 422.1 | 318.5 | 274.6 | 99.06 | 174.0 | 192.3 |
|           | Node          | eservoir | 1     | 2     | 3     | 4     | 5     | 6     | 7     | 8     | 9     | 10    | 11    | 12    |
|           | Elevation (m) | 962      | 901.5 | 896.5 | 895.5 | 903.5 | 903.5 | 902.5 | 901.5 | 900   | 900.5 | 900.5 | 903.5 | 902   |
| Node data | Demand (m³/h) | -301.176 | 21.78 | 7.81  | 20.56 | 7.56  | 22.64 | 30.13 | 13.25 | 32.58 | 18.86 | 32.8  | 14.29 | 0     |
|           | Node          | 13       | 14    | 15    | 16    | 17    | 18    | 19    | 20    | 21    | 22    | 23    | 24    |       |
|           | Elevation (m) | 899      | 905   | 898   | 900.5 | 900.5 | 899.5 | 901.5 | 902   | 902   | 898   | 900.5 | 904   |       |
|           | Demand (m³/h) | 18.79    | 9.54  | 7.45  | 15.8  | 11.02 | 16.31 | 0     | 0     | 0     | 0     | 0     | 0     |       |

\* They are existing pipes in the network and are not considered in the total cost of the network.

Table 9. Pipe sizes and costs for Real- life network



| Pipe | Diameter (mm) | Cost (Rial/m) | Pipe | Diameter (mm) | Cost (Rial/m) |
|------|---------------|---------------|------|---------------|---------------|
| 1    | 76.6          | 49560         | 6    | 191.8         | 305200        |
| 2    | 93.8          | 73360         | 7    | 213.2         | 375200        |
| 3    | 106.6         | 94360         | 8    | 238.8         | 470400        |
| 4    | 136.4         | 154000        | 9    | 268.6         | 593600        |
| 5    | 170.6         | 239680        | 10   | 302.8         | 753200        |

\* pipes cost is 28000 Rial/kg based on PE-80 standards with 10 atm pressure.

340 In the first step, as a result of single-objective optimization using GA in GANetXL, the minimum cost is estimated  $7.54 \times 10^8$  Rials with 100000 NFEs which shows a cost decrease of 46.14% in comparison to the solution of the consultant company with  $14 \times 10^8$  Rials (Rasekh, Afshar et al. 2010).

In the second step, the results of figure 10 (a-d) shows that the  $I_r$ ,  $MRI$ ,  $I_m$  criteria have better performance than  $I_n$  criterion for this network in terms of non-dominated solutions. All these three criteria have similar solutions of maximum and minimum

345 cost in the Pareto front. All of the solutions in the Pareto front (figure 10) which obtained by NSGA-II is feasible and satisfied the velocity and pressure constraints.

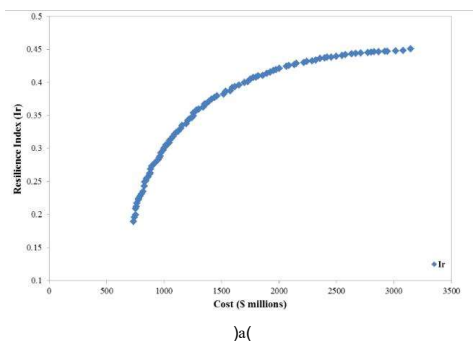



350

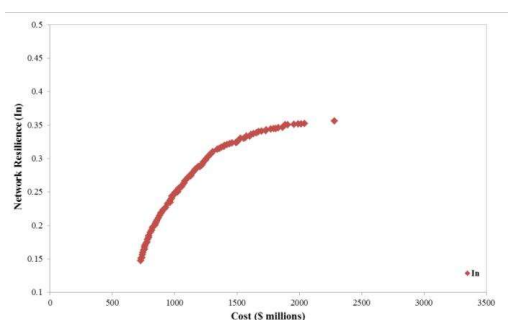

)b(

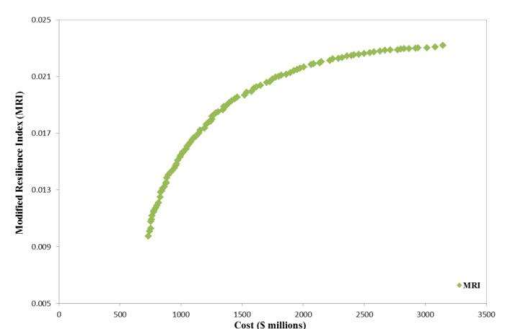

)c(

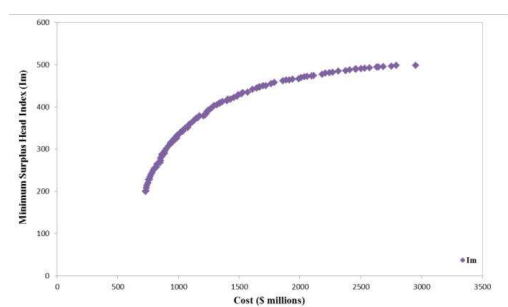

)d(



355 Fig. 10 Pareto front of two-objective function optimization of the Real- life network, (a) Cost-  $I_r$ , (b) Cost-  $I_n$ , (c)

Cost-  $MRI$ , (d) Cost-  $I_m$

The results shown in figure 11 demonstrate that in the cost-based optimization, surplus pressure in the nodes number 13 and 23 is less than 1m that explains these nodes are the most critical ones in the network.  $I_r$  and  $MRI$  criteria have similar and more successful performance compared to  $I_m$  in terms of the surplus pressure for all the nodes in the network.  $I_n$  has less capability

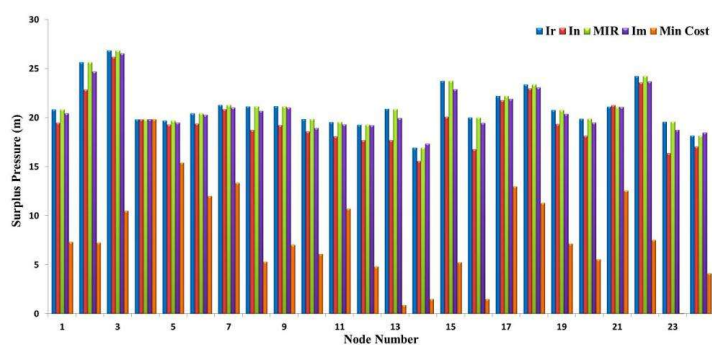

Fig. 11 Surplus pressure of the real- life for solutions of maximum reliability criteria and minimum cost

Table 10 presents statistical parameters for new pipes of Real- life Network in result of different runs by GANetXL when optimization approach is cost-based. According to this table pipes No. 18 and 21 were chosen to evaluate the performance of reliability criteria under failure condition because these pipes have less standard deviation and coefficient of variation than other pipes. Moreover, in this network the failure probability should be evaluated in the existing pipes because they have more lifetime in comparison to new pipes. There are different methods accessible to estimate the probability of pipe failure, repair time, and failure return periods. Interested readers should refer to Chapter 18 of Mays (2000). Subsequently, in this study, a random pipe failure has been created using a uniform distribution in the range of [26, 37], that is the pipe numbers for existing pipes (Shafiqul

370 Islam, Sadiq et al. 2013) Finally, the failure of the pipes No. 27 and 34 was analyzed in the network.

Table 10. Statistical parameters for diameters obtained for each new pipe of Real- life network

| Pipe numb | Maximum (m) | Minimum (m) | Average (m) | ST. DEV | Variance | C.V. |
|-----------|-------------|-------------|-------------|---------|----------|------|
| 1         | 213.2       | 76.6        | 125.86      | 21.14   | 446.99   | 0.17 |
| 2         | 170.6       | 76.6        | 83.30       | 16.06   | 257.93   | 0.19 |
| 3         | 238.8       | 76.6        | 140.96      | 23.97   | 574.42   | 0.17 |
| 4         | 302.8       | 76.6        | 93.83       | 25.70   | 660.65   | 0.27 |
| 5         | 213.2       | 76.6        | 94.09       | 20.03   | 401.31   | 0.21 |





|    |       |      |        |              |         |             |
|----|-------|------|--------|--------------|---------|-------------|
| 6  | 302.8 | 76.6 | 112.86 | 37.87        | 1433.82 | 0.34        |
| 7  | 136.4 | 76.6 | 97.10  | 15.48        | 239.59  | 0.16        |
| 8  | 268.6 | 76.6 | 80.66  | 21.65        | 468.56  | 0.27        |
| 9  | 341.2 | 76.6 | 100.11 | 31.71        | 1005.72 | 0.32        |
| 10 | 341.2 | 76.6 | 97.53  | 42.00        | 1763.92 | 0.43        |
| 11 | 191.8 | 76.6 | 106.91 | 20.70        | 428.58  | 0.19        |
| 12 | 191.8 | 76.6 | 97.50  | 17.47        | 305.09  | 0.18        |
| 13 | 403.8 | 76.6 | 109.44 | 39.39        | 1551.55 | 0.36        |
| 14 | 213.2 | 76.6 | 117.36 | 29.38        | 863.00  | 0.25        |
| 15 | 238.8 | 76.6 | 113.80 | 34.39        | 1182.59 | 0.30        |
| 16 | 302.8 | 76.6 | 94.20  | 32.44        | 1052.59 | 0.34        |
| 17 | 238.8 | 76.6 | 122.40 | 43.05        | 1853.03 | 0.35        |
| 18 | 136.4 | 76.6 | 91.02  | <b>11.28</b> | 127.19  | <b>0.12</b> |
| 19 | 191.8 | 76.6 | 96.02  | 15.58        | 242.86  | 0.16        |
| 20 | 213.2 | 76.6 | 94.89  | 22.87        | 522.88  | 0.24        |
| 21 | 136.4 | 76.6 | 90.13  | <b>10.38</b> | 107.72  | <b>0.12</b> |
| 22 | 302.8 | 76.6 | 88.82  | 32.45        | 1052.68 | 0.37        |
| 23 | 268.6 | 76.6 | 88.20  | 31.13        | 968.85  | 0.35        |
| 24 | 170.6 | 76.6 | 93.74  | 17.64        | 311.19  | 0.19        |

The results of the investigations in figure 12 shows that only the failure in Pipe No. 18 can influence the pressure nodes.

375 Consequently, this pipe is one of the most sensitive pipes in this network. However, reliability performance in the failure conditions is similar to no failure conditions in figure 11. Finally, for this network that includes low diameter in existing pipes,

$I_s$  has not a suitable performance because of making the uniformity in pipes connected to a node leads to the decrease of the diameter of new pipes. Thus, the capability of the surplus pressure decreases due to the increase in head-loss in the pipes.

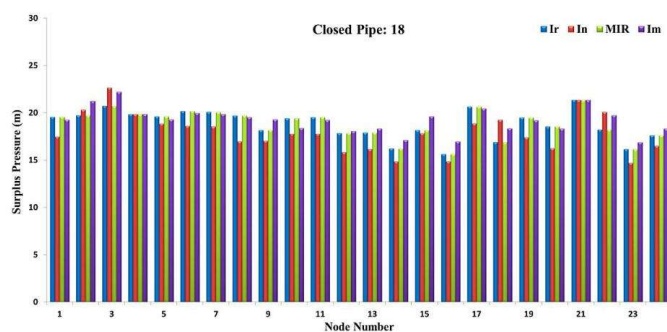



380

)a(

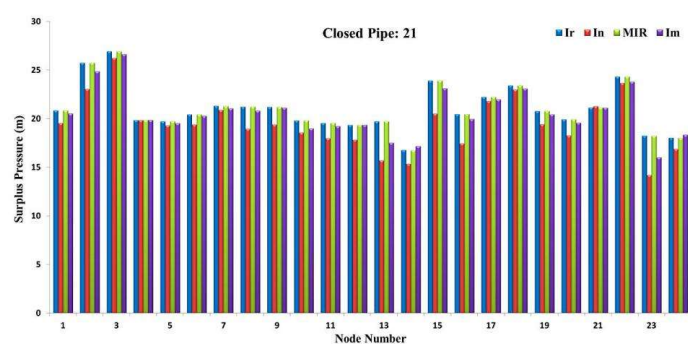

)b(

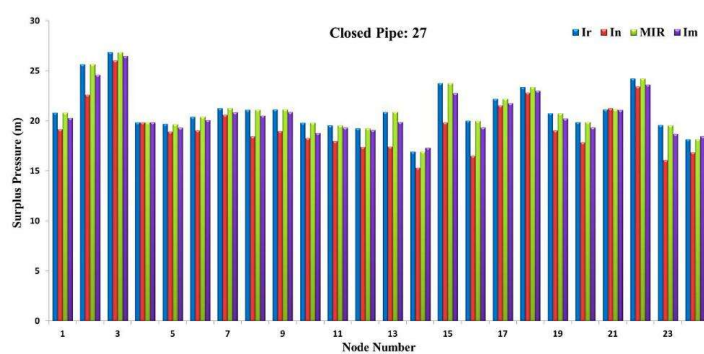

)c(

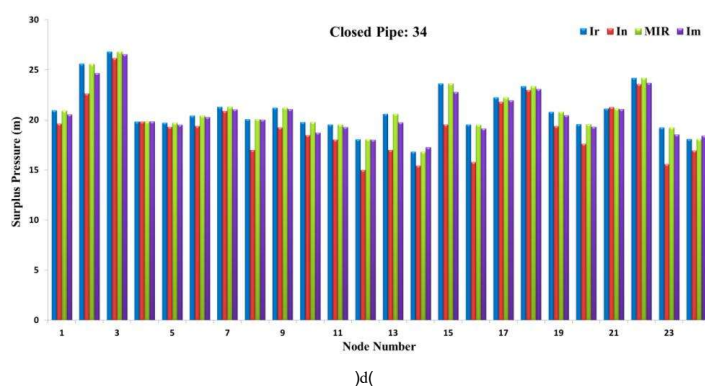

Fig. 12 Surplus pressure of nodes in Real- life network for solutions of maximum reliability criteria under failure of pipes No. (a) 18, (b) 21, (c) 27 and (d) 34

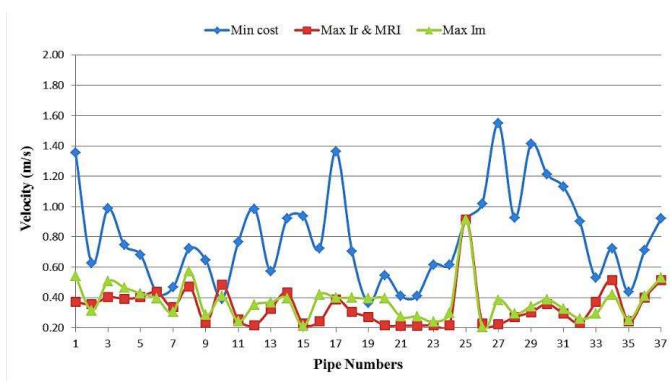

Fig. 13 Velocity variations in pipes for the solutions of minimum cost and maximum  $I_r$ ,  $MRI$  and  $I_m$  criteria

Figure 13 shows the velocity variations in the pipes for the solutions with minimum cost and maximum  $I_r$ ,  $MRI$  and  $I_m$  criteria obtained using GA and NSGA-II in GANetXL. As it is observed, when the cost is the basis for the design and optimization of Real- life network, velocity variation are so high in the pipes. This can lead to some issues in the network. But

**Commented [AA24]:** I would remove the lines. These are discrete values, the lines adds no information

**Commented [AA25]:** I would argue that the velocities for solutions Max  $I_r$  and Max  $I_m$  are more uniform but quite low – wouldn't you say that the network is oversized? I would like to see how this impacts water age and the velocities in low consumption periods

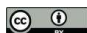

395 in the presented solutions with maximum reliability criteria (  $I_r$  ,  $MRI$  and  $I_m$  ), velocity variations are not only low but almost uniform.

#### 4. Conclusions

In this paper the performance of a few reliability criteria was evaluated when applying to a two benchmark (Two-loop and Hanoi) and one real-life (in Iran) networks. Both the existing pipes and hydraulic constraints were considered in the study in which GANetXL was used as the optimizer. The optimizations were performed taking into account two different objective functions including a cost and reliability.

The results of cost-oriented optimization showed that the solutions proposed by GANetXL for case study networks give solutions that are either less expensive than or as the same as the ones from literature. In order to investigate the solutions with maximum values of  $I_r$  ,  $I_n$  ,  $MRI$  and  $I_m$  criteria and finding sensitive and important pipes with the most probability of failure in the network, statistical analysis of single-objective optimization was used. The results showed that  $I_r$  ,  $MRI$  and  $I_m$  criteria have better performance than  $I_n$  under failure conditions, especially in real-life networks that include the existing pipes with small diameter and if a WDN was only optimized based on cost, it would be difficult to overcome losses in pipe failure conditions and pressure supply of nodes.

410

**Competing interests:** There is no conflict of interest.

**Data Availability:** All data and models generated or used during this study are proprietary and confidential in nature.

**Author contribution:** Conceptualization and data curation were done by A Moghaddam, formal analysis and methodology carried out by A Moghaddam, R Peirovi and H Rezaee, project administration was done by A Faridhosseini and R Peirovi, visualization and writing have prepared by A Naghi Ziaei, A Moghaddam and R Peirovi.

#### References

- Alperovits, E. and U. Shamir (1977). "Design of optimal water distribution systems." *Water resources research* **13**(6): 885-900.
- Atiquzzaman, M. and S.-Y. Liong (2004). "Using shuffled complex evolution to calibrate water distribution network model." *Journal of Civil Engineering (IEB)* **32**(2): 111-119.
- 420 Atkinson, S., R. Farmani, F. A. Memon and D. Butler (2014). "Reliability indicators for water distribution system design: Comparison." *Journal of Water Resources Planning and Management* **140**(2): 160-168.
- Baños, R., C. Gil, J. Agulleiro and J. Reza (2007). A memetic algorithm for water distribution network design. *Soft computing in industrial applications*. Springer: 279-289.
- 425 Baños, R., J. Reza, J. Martínez, C. Gil and A. L. Márquez (2011). "Resilience indexes for water distribution network design: a performance analysis under demand uncertainty." *Water resources management* **25**(10): 2351-2366.
- Cunha, M. d. C. and J. Sousa (1999). "Water distribution network design optimization: simulated annealing approach." *Journal of Water Resources Planning and Management* **125**(4): 215-221.
- Deb, K., A. Pratap, S. Agarwal and T. Meyarivan (2002). "A fast and elitist multiobjective genetic algorithm: NSGA-II." *IEEE transactions on evolutionary computation* **6**(2): 182-197.
- 430 Department of Technical Affairs, B. o. E. a. T. C. f. W. a. W., Ministry of Energy (2013). Design Criteria of Urban and Rural Water Supply and Distribution Systems. No . 117-3, Vice Presidency For Strategic Planning and Supervision.
- Eusuff, M. M. and K. E. Lansey (2003). "Optimization of water distribution network design using the shuffled frog leaping algorithm." *Journal of Water Resources planning and management* **129**(3): 210-225.



- Farmani, R., H. J. Henriksen and D. Savic (2009). "An evolutionary Bayesian belief network methodology for optimum management of groundwater contamination." *Environmental Modelling & Software* **24**(3): 303-310.
- 435 Farmani, R., D. Savic and G. Walters (2005). "Evolutionary multi-objective optimization in water distribution network design." *Engineering Optimization* **37**(2): 167-183.
- Fujiwara, O. and D. B. Khang (1990). "A two-phase decomposition method for optimal design of looped water distribution networks." *Water resources research* **26**(4): 539-549.
- 440 Geem, Z. W. (2009). "Harmony search optimisation to the pump-included water distribution network design." *Civil Engineering and Environmental Systems* **26**(3): 211-221.
- Geem, Z. W., J. H. Kim and G. Loganathan (2002). "Harmony search optimization: application to pipe network design." *International Journal of Modelling and Simulation* **22**(2): 125-133.
- Greco, R., A. Di Nardo and G. Santonastaso (2012). "Resilience and entropy as indices of robustness of water distribution networks." *Journal of Hydroinformatics* **14**(3): 761-771.
- 445 Jacoby, S. L. (1968). "Design of optimal hydraulic networks." *Journal of the Hydraulics Division* **94**(3): 641-662.
- Jayaram, N. and K. Srinivasan (2008). "Performance-based optimal design and rehabilitation of water distribution networks using life cycle costing." *Water Resources Research* **44**(1).
- Lansey, K. E. and L. W. Mays (1989). Optimization models for design of water distribution systems. *Reliability Analysis of Water Distribution Systems. Part I: State-of-the-Art*.
- 450 Lin, M.-D., Y.-H. Liu, G.-F. Liu and C.-W. Chu (2007). "Scatter search heuristic for least-cost design of water distribution networks." *Engineering Optimization* **39**(7): 857-876.
- Lippai, I., J. P. Heaney and M. Laguna (1999). "Robust water system design with commercial intelligent search optimizers." *Journal of Computing in Civil Engineering* **13**(3): 135-143.
- 455 Loganathan, G., J. Greene and T. Ahn (1995). "Design heuristic for globally minimum cost water-distribution systems." *Journal of Water Resources Planning and Management* **121**(2): 182-192.
- Maier, H. R., A. R. Simpson, A. C. Zecchin, W. K. Foong, K. Y. Phang, H. Y. Seah and C. L. Tan (2003). "Ant colony optimization for design of water distribution systems." *Journal of water resources planning and management* **129**(3): 200-209.
- Mala-Jetmarova, H., A. Barton and A. Bagirov (2014). "Exploration of the trade-offs between water quality and pumping costs in optimal operation of regional multiquality water distribution systems." *Journal of Water Resources Planning and Management* **141**(6): 04014077.
- 460 Mala-Jetmarova, H., A. Barton and A. Bagirov (2015). "Impact of water-quality conditions in source reservoirs on the optimal operation of a regional multiquality water-distribution system." *Journal of Water Resources Planning and Management* **141**(10): 04015013.
- 465 Miri, S. M. and A. Afshar (2014). "Optimum Layout for Sensors in Water Distribution Networks through Ant Colony Algorithm: A Dual Use Vision." *Journal of Water and Wastewater(parallel title ); Ab va Fazilab ( in persian )* **25**(3): 67-75.
- Moghaddam, A., A. Alizadeh, A. Faridhosseini, A. Ziaei and D. F. Heravi (2018). "Optimal design of water distribution networks using simple modified particle swarm optimization approach." *Desalination and Water Treatment In press*: 1-12.
- Mohan, S. and K. J. Babu (2009). "Water distribution network design using heuristics-based algorithm." *Journal of Computing in Civil Engineering* **23**(5): 249-257.
- 470 Murphy, L. and A. Simpson (1992). "Pipe optimization using genetic algorithms." *Res. Rep* **93**: 95.
- Neelakantan, T., C. Suribabu and S. Lingireddy (2008). "Optimisation procedure for pipe-sizing with break-repair and replacement economics." *Water SA* **34**(2): 217-224.
- Pandit, A. and J. C. Crittenden (2012). "Index of network resilience (INR) for urban water distribution systems." *Nature Urban Water Journal* **13**(4): 412-425.
- 475 Piratla, K. R. (2016). "Investigation of sustainable and resilient design alternatives for water distribution networks." *Urban Water Journal* **13**(4): 412-425.
- Piratla, K. R. and S. T. Ariaratnam (2012). "Reliability based optimal design of water distribution networks considering life cycle components." *Urban Water Journal* **9**(5): 305-316.
- Prasad, T. D. and N.-S. Park (2004). "Multiobjective genetic algorithms for design of water distribution networks." *Journal of Water Resources Planning and Management* **130**(1): 73-82.
- 480 Quindry, G. E., J. C. Liebman and E. D. Brill (1981). "Optimization of looped water distribution systems." *Journal of the Environmental Engineering Division* **107**(4): 665-679.
- Raad, D., A. Sinske and J. van Vuuren (2010). "Multiobjective optimization for water distribution system design using a hyperheuristic." *Journal of Water Resources Planning and Management* **136**(5): 592-596.
- 485 Rasekh, A., A. Afshar and M. H. Afshar (2010). "Risk-cost optimization of hydraulic structures: methodology and case study." *Water resources management* **24**(11): 2833-2851.
- Reca, J., J. Martinez, R. Banos and C. Gil (2008). "Optimal design of gravity-fed looped water distribution networks considering the resilience index." *Journal of Water Resources Planning and Management* **134**(3): 234-238.
- Rossman, L. A. (2000). "EPANET 2: users manual."



- 490 Savić, D. A., J. Bicik and M. S. Morley (2011). "A DSS generator for multiobjective optimisation of spreadsheet-based models." *Environmental modelling & software* **26**(5): 551-561.
- Savić, D. A. and G. A. Walters (1997). "Genetic algorithms for least-cost design of water distribution networks." *Journal of water resources planning and management* **123**(2): 67-77.
- Shafiqul Islam, M., R. Sadiq, M. J. Rodriguez, H. Najjaran and M. Hoorfar (2013). "Reliability assessment for water supply systems under uncertainties." *Journal of Water Resources Planning and Management* **140**(4): 468-479.
- 495 Simpson, A. R., G. C. Dandy and L. J. Murphy (1994). "Genetic algorithms compared to other techniques for pipe optimization." *Journal of water resources planning and management* **120**(4): 423-443.
- Simpson, A. R. and D. E. Goldberg (1994). "Pipeline optimization via genetic algorithms: From theory to practice." *Water pipeline systems*: 309-320.
- 500 Su, Y.-C., L. W. Mays, N. Duan and K. E. Lansey (1987). "Reliability-based optimization model for water distribution systems." *Journal of Hydraulic Engineering* **113**(12): 1539-1556.
- Tabesh, M., T. T. Tanyimboh and R. Burrows (2001). *Extended period reliability analysis of water distribution systems based on head driven simulation method*. Bridging the Gap: Meeting the World's Water and Environmental Resources Challenges.
- Tayfur, G. (2017). "Modern optimization methods in water resources planning, engineering and management." *Water Resources Management* **31**(10): 3205-3233.
- 505 Todini, E. (2000). "Looped water distribution networks design using a resilience index based heuristic approach." *Urban water* **2**(2): 115-122.
- Vasan, A. and S. P. Simonovic (2010). "Optimization of water distribution network design using differential evolution." *Journal of Water Resources Planning and Management* **136**(2): 279-287.
- 510 Watanatada, T. (1973). "Least-cost design of water distribution systems." *Journal of the Hydraulics Division* **99**(9): 1497-1513.
- Zecchin, A. C., A. R. Simpson, H. R. Maier, M. Leonard, A. J. Roberts and M. J. Berrisford (2006). "Application of two ant colony optimisation algorithms to water distribution system optimisation." *Mathematical and Computer Modelling* **44**(5-6): 451-468.
